# Supplementary material
Source: publisher site journal article supplement (https://www.dovepress.com/get_supplementary_file.php?f=502481.docx)
Supplement: Supplementary file 1 [file get_supplementary_file.php]

***Supplementary Material***

**Dynamic Complement Protein Changes in Aqueous Humor and Plasma of Patients with Retinal Vein Occlusion During Ranibizumab Treatment**

**
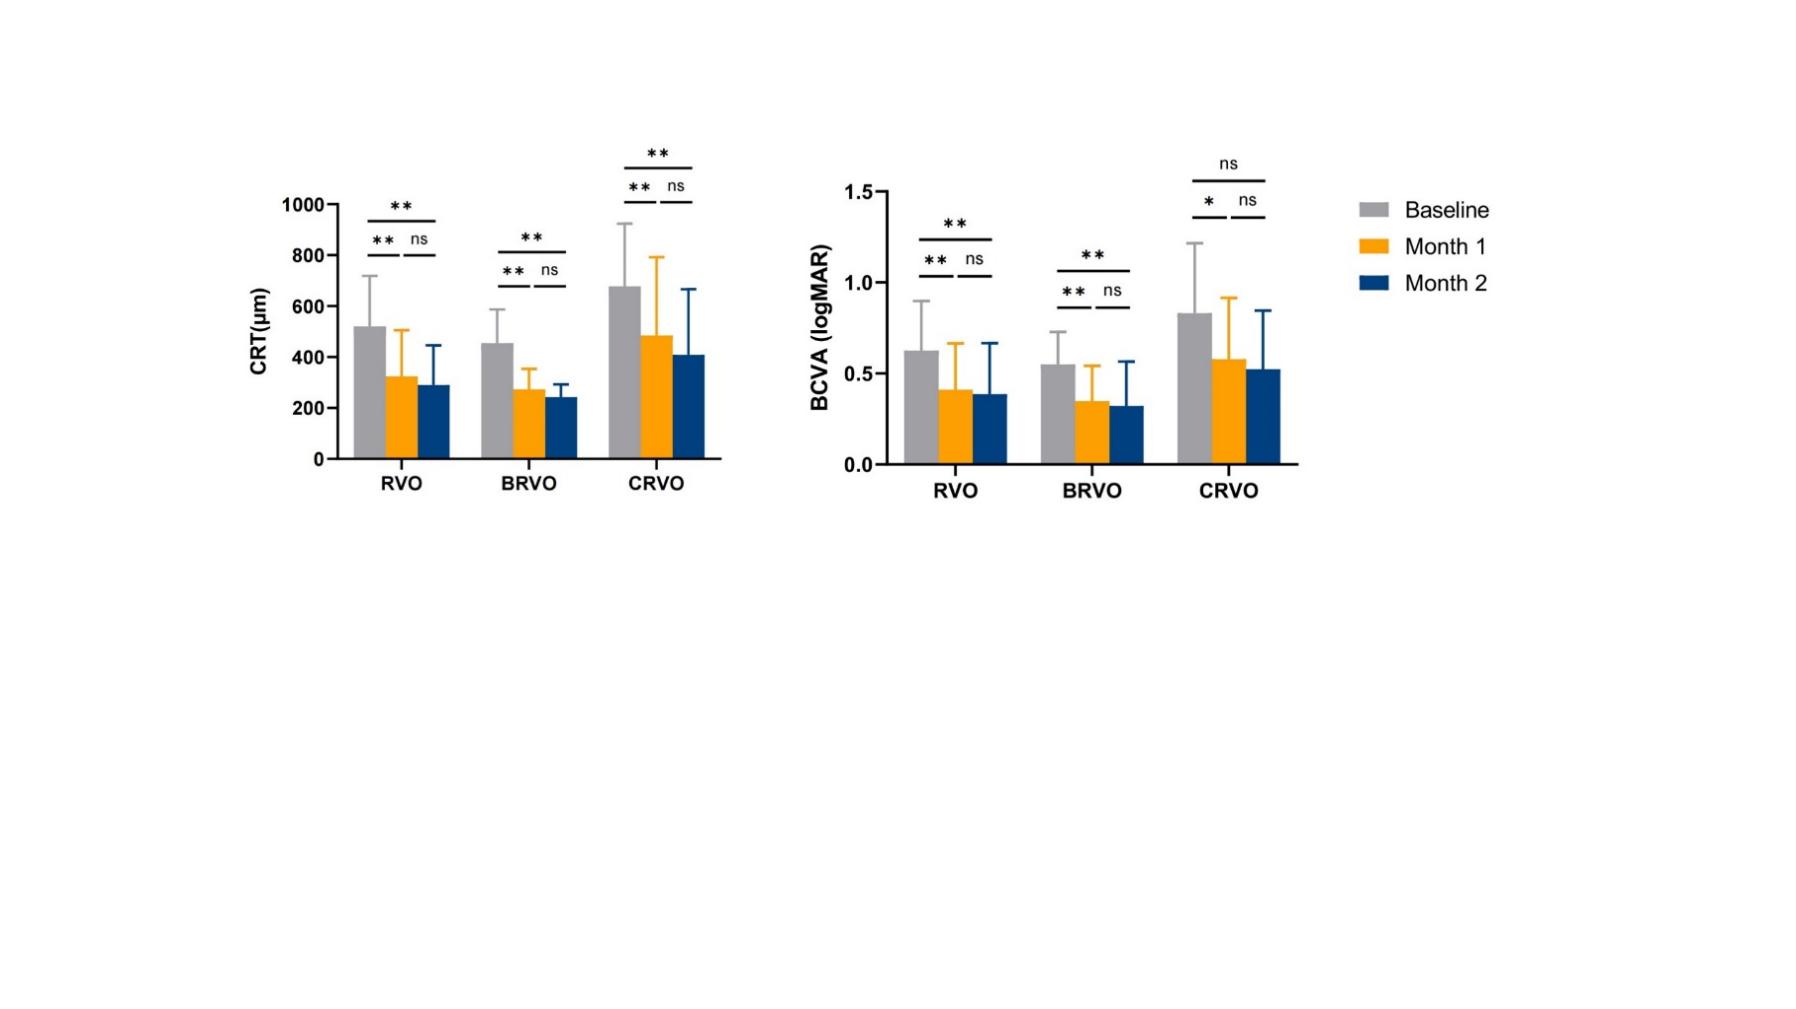
**

**Supplement Figure 1.** Changes in the mean CRT and the mean logMAR of BCVA during the course of 3 consecutive monthly IVR injections for the treatment of RVO. Error bars indicate the SD from the mean. * p＜ 0.05, ** p ≤ 0.01.

**Abbreviations:** *CRT*, central retinal thickness; *BCVA*, best-corrected visual acuity; *logMAR*, logarithm of minimal angle of resolution; *IVR*, intravitreal ranibizumab; *RVO*, retinal vein occlusion; *BRVO*, branch retinal vein occlusion; *CRVO*, central retinal vein occlusion; *SD*, standard deviation.

**Supplementary Table S1.** Correlation analysis of complement proteins and disease duration at baseline in the aqueous humor and plasma of RVO patients.

| **Variables**  **(ng/ml)** | **Aqueous humor** | | | |  | **Plasma** | | | |
| --- | --- | --- | --- | --- | --- | --- | --- | --- | --- |
| **≤ 1m (n=12)** | **＞1m (n=15)** | **r** | **p** |  | **≤ 1m (n=12)** | **＞1m (n=14)** | **r** | **p** |
| C1q | 73.69 ± 80.70 | 54.92 ± 48.32 | 0.196 | 0.542 |  | 151810.00 ± 24948.26 | 161131.43 ± 28040.59 | 0.028 | 0.936 |
| C2 | 716.35 ± 1023.02 | 268.02 ± 229.65 | 0.264 | 0.407 |  | 34714.08 ± 14787.96 | 31464.49 ± 14363.04 | -0.467 | 0.147 |
| C4 | 436.74 ± 192.92 | 394.11 ± 195.97 | 0.209 | 0.515 |  | 1045220.00 ± 343768.00 | 1159088.57 ± 301740.34 | **-0.637** | **0.035** |
| C4b | 100.88 ± 89.77 | 99.80 ± 93.69 | 0.132 | 0.683 |  | 64943.20 ± 20220.64 | 77195.99 ± 22482.32 | -0.466 | 0.149 |
| C3 | 397.75 ± 108.76 | 389.40 ± 135.85 | -0.343 | 0.275 |  | 1375246.67 ± 1693177.70 | 1298660.00 ± 830196.52 | -0.398 | 0.226 |
| C3b/iC3b | 3958.53 ± 3268.29 | 3192.20 ± 2765.19 | 0.399 | 0.199 |  | 120493.33 ± 150907.58 | 110062.86 ± 59503.99 | -0.393 | 0.231 |
| C5 | 431.56 ± 391.49 | 426.31 ± 488.20 | -0.118 | 0.715 |  | 27794.14 ± 6933.83 | 36448.11 ± 12346.79 | -0.589 | 0.057 |
| C5a | 0.40 ± 0.36 | 0.36 ± 0.35 | -0.080 | 0.806 |  | 8.85 ± 3.29 | 10.00 ± 2.66 | -0.010 | 0.976 |
| CFB | 256.62 ± 52.96 | 239.35 ± 106.02 | 0.109 | 0.736 |  | 319246.67 ± 80216.38 | 352705.71 ± 95251.03 | -0.307 | 0.358 |
| CFD | 57.53 ± 28.87 | 59.51 ± 39.08 | 0.010 | 0.977 |  | 4646.67 ± 1594.29 | 7625.16 ± 9450.14 | -0.326 | 0.328 |
| CFH | 400.17 ± 249.38 | 325.25 ± 204.05 | 0.394 | 0.205 |  | 482163.33 ± 93380.05 | 545271.43 ± 104442.92 | -0.237 | 0.483 |
| CFI | 622.41 ± 476.56 | 481.07 ± 342.30 | 0.271 | 0.394 |  | 88101.22 ± 37557.07 | 95291.89 ± 30443.82 | -0.170 | 0.618 |
| MBL | 0.51 ± 0.34 | 0.50 ± 0.74 | 0.340 | 0.280 |  | 3007.12 ± 2068.32 | 5955.75 ± 5867.64 | 0.523 | 0.099 |

Pearson correlation analysis the link between aqueous humor levels of complement proteins and disease duration.

Pearson correlation coefficients and P values are presented. Bold p < 0.05.

**Abbreviations:** *RVO,* retinal vein occlusion; *CFB,* complement factor B; *CFD,* complement factor D; *CFH,* complement factor H; *CFI,* complement factor I; *MBL,* mannose-binding lectin.

**Supplementary Table S2.** Correlation analysis of complement proteins and BCVA logMAR in the aqueous humor of RVO patients.

| **Variables** | **Baseline** | | **Δ1** | | **Δ2** | |
| --- | --- | --- | --- | --- | --- | --- |
| **r** | **P** | **r** | **P** | **r** | **P** |
| C1q | 0.382 | 0.054 | -0.010 | 0.963 | 0.151 | 0.525 |
| C2 | 0.377 | 0.057 | -0.108 | 0.607 | -0.179 | 0.451 |
| C4 | 0.285 | 0.158 | -0.053 | 0.803 | 0.135 | 0.571 |
| C4b | 0.337 | 0.092 | -0.041 | 0.846 | -0.103 | 0.667 |
| C3 | -0.260 | 0.199 | -0.286 | 0.166 | -0.210 | 0.375 |
| C3b/iC3b | 0.264 | 0.193 | 0.099 | 0.636 | 0.221 | 0.350 |
| C5 | 0.180 | 0.379 | 0.187 | 0.371 | 0.121 | 0.610 |
| C5a | 0.249 | 0.219 | 0.175 | 0.401 | 0.039 | 0.870 |
| CFB | -0.113 | 0.582 | -0.181 | 0.387 | 0.088 | 0.713 |
| CFD | 0.360 | 0.071 | 0.028 | 0.894 | 0.239 | 0.311 |
| CFH | 0.218 | 0.285 | -0.009 | 0.965 | 0.198 | 0.402 |
| CFI | 0.262 | 0.197 | 0.051 | 0.808 | 0.186 | 0.434 |
| MBL | 0.002 | 0.991 | -0.237 | 0.255 | -0.255 | 0.278 |

Pearson’s correlation analysis was used. Pearson correlation coefficients and P values are presented.

Δ1 = Change from baseline to month 1, Δ2 = Change from baseline to month 2.

**Abbreviations:** *RVO,* retinal vein occlusion; *CFB,* complement factor B; *CFD,* complement factor D; *CFH,* complement factor H; *CFI,* complement factor I; *MBL,* mannose-binding lectin.
